# Supplementary material for: Serum S100B and LDH at Baseline and During Therapy Predict the Outcome of Metastatic Melanoma Patients Treated with BRAF Inhibitors
Source: PubMed Central journal article supplement — Target Oncol. 2021 Feb 8;16(2):197–205. doi: 10.1007/s11523-021-00792-8 (PMC7935737; doi:10.1007/s11523-021-00792-8), 2021-02-08
Supplement: 11523_2021_792_MOESM1_ESM.pdf [file 11523_2021_792_MOESM1_ESM.pdf]

# **Serum S100B and LDH at baseline and during therapy predict the outcome of metastatic melanoma patients treated with BRAF inhibitors**

## **Running heading**

S100B and LDH predict the outcome of melanoma patients treated with BRAF inhibitors

## **Authors**

Maximilian Gassenmaier, MD<sup>1\*</sup>, Max M. Lenders, MD<sup>1\*</sup>, Andrea Forschner, MD<sup>1</sup>, Ulrike Leiter, MD<sup>1</sup>, Benjamin Weide, MD<sup>1</sup>, Claus Garbe, MD<sup>1</sup>, Thomas K. Eigentler, MD<sup>1</sup>, Nikolaus B. Wagner, MD<sup>1,2</sup>

## **Affiliations**

<sup>1</sup>Department of Dermatology, University Hospital Tübingen, Tübingen, Germany

<sup>2</sup>Department of Dermatology and Allergology, Kantonsspital St. Gallen, St. Gallen, Switzerland

\*These authors contributed equally to this work.

## **Corresponding author**

Nikolaus B. Wagner, MD; Department of Dermatology and Allergology, Kantonsspital St. Gallen, Rorschacherstrasse 95, CH-9007 St. Gallen, Switzerland, phone: +41 71 494 20 30, fax: +41 71 494 73 42, email: nikolausbenjamin.wagner@kssg.ch.

ORCID ID: 0000-0003-4708-2886

Supplementary Fig. S1

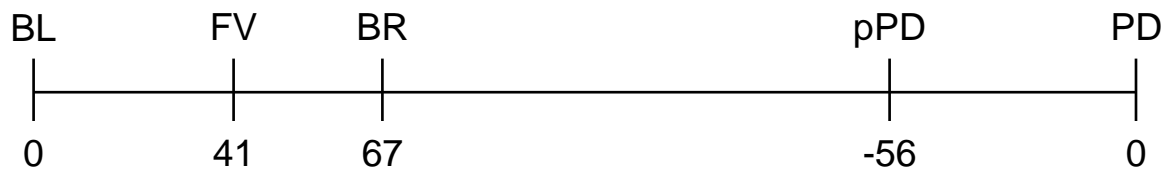

**Supplementary Fig. S1** Schematic time line of blood draws

Median time points of blood draws at the indicated visits.

Abbreviations: BL, baseline; BR, best response; FV, first visit; PD, progressive disease; pPD, prior to PD.
